# Supplementary material for: Unraveling the interlayer coupling effect on layer-dependent electronic and optoelectronic properties in two-dimensional semiconductors
Source: Royal Society of Chemistry journal article supplement (doi:10.1039/d5tc00054h), 2025-01-01
Supplement: d5tc00054h1.pdf [file d5tc00054h1.pdf]

## Supporting Information for

### **Unraveling interlayer coupling effect on layer-dependent electronic and optoelectronic properties in two-dimensional semiconductors**

Zeqi Hua,<sup>a</sup> Haibo Shu,<sup>a,b,\*</sup> Dabao Xie,<sup>a</sup> Zehao Liu,<sup>a</sup> Jiayu Liang,<sup>a,\*</sup> Jing Zhou,<sup>b</sup>  
Xiaoshuang Chen,<sup>b</sup> and Dan Cao<sup>c</sup>

<sup>a</sup> College of Optical and Electronic Technology, China Jiliang University, Hangzhou 310018, China.

<sup>b</sup> State Key Laboratory of Infrared Physics, Shanghai Institute of Technical Physics, Chinese Academy of Science, Shanghai 200083, China

<sup>c</sup> College of Science, China Jiliang University, Hangzhou 310018, China

\*Corresponding author. Email: [shuhaibo@cjl.u.edu.cn](mailto:shuhaibo@cjl.u.edu.cn), [jyliang513@cjl.u.edu.cn](mailto:jyliang513@cjl.u.edu.cn)

#### **CONTENTS**

- S1. Vacuum-layer-dependent absorption spectra and absorptivity
  - S2. Lattice and energetic parameters of 2D semiconductors
  - S3. Comparison of interlayer binding energies of 2D semiconductors between this work and previous studies
  - S4. Comparison of interlayer binding energy and interlayer distance between the bilayer and bulk van der Waals crystals
  - S5. Projected band structures of trilayer PtSe<sub>2</sub> and HfSe<sub>2</sub>
  - S6. Projected density of states of 2D PtSe<sub>2</sub> and HfSe<sub>2</sub>
  - S7. Transmission spectra of 2D PtSe<sub>2</sub> and HfSe<sub>2</sub> devices
  - S8. Polarized photocurrent of 2D PtSe<sub>2</sub> and HfSe<sub>2</sub> under different photon energies
- References

## S1. Vacuum-layer-dependent absorption spectra and absorptivity

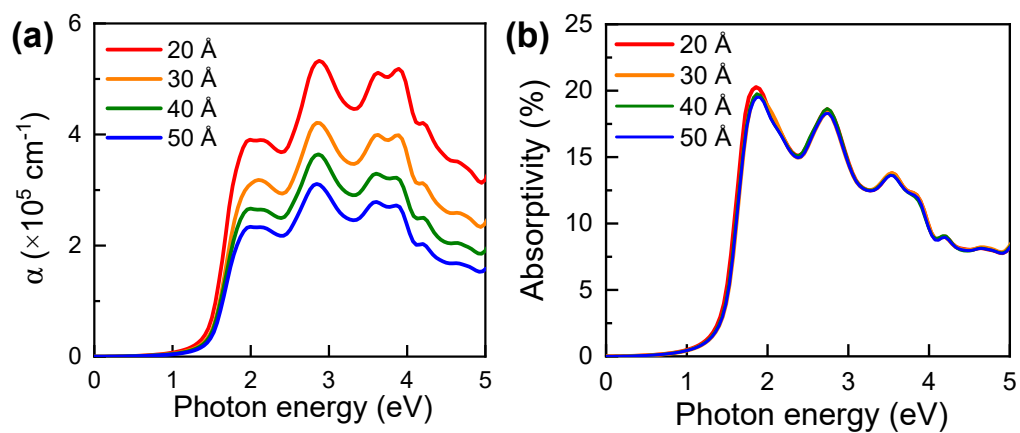

**Fig. S1** (a) Absorption spectra and (b) absorptivity of monolayer PtSe<sub>2</sub> with different thicknesses (20~50 Å) of vacuum layer in the calculated models.

## S2. Lattice and energetic parameters of 2D semiconductors

**Table S1.** In-plane lattice parameters ( $a$  and  $b$ ), interlayer distance ( $d_{\text{int}}$ ), and interlayer binding energy ( $E_b$ ) of eighteen 2D semiconductors.

| Materials         | $a$ (Å) | $b$ (Å) | $d_{\text{int}}$ (Å) | $E_b$ (meV/Å <sup>2</sup> ) |
|-------------------|---------|---------|----------------------|-----------------------------|
| PtS <sub>2</sub>  | 3.56    | 3.56    | 2.32                 | 31.7                        |
| PtSe <sub>2</sub> | 3.75    | 3.75    | 2.27                 | 35.7                        |
| HfS <sub>2</sub>  | 3.64    | 3.64    | 3.01                 | 21.9                        |
| HfSe <sub>2</sub> | 3.76    | 3.76    | 3.13                 | 22.3                        |
| TiS <sub>2</sub>  | 3.40    | 3.40    | 2.87                 | 24.8                        |
| TiSe <sub>2</sub> | 3.52    | 3.52    | 3.00                 | 26.8                        |
| WS <sub>2</sub>   | 3.18    | 3.18    | 3.10                 | 26.1                        |
| WSe <sub>2</sub>  | 3.31    | 3.31    | 3.18                 | 25.6                        |
| MoS <sub>2</sub>  | 3.18    | 3.18    | 3.04                 | 25.2                        |
| MoSe <sub>2</sub> | 3.32    | 3.32    | 3.18                 | 27.1                        |
| MoTe <sub>2</sub> | 3.55    | 3.55    | 3.33                 | 26.1                        |
| ReS <sub>2</sub>  | 6.41    | 6.51    | 3.63                 | 21.1                        |
| ReSe <sub>2</sub> | 6.65    | 6.78    | 3.41                 | 23.1                        |
| SnS               | 4.07    | 4.31    | 3.63                 | 29.3                        |
| SnSe              | 4.29    | 4.41    | 2.74                 | 30.1                        |
| GeS               | 3.62    | 4.57    | 2.65                 | 29.7                        |
| GeSe              | 3.98    | 4.26    | 2.94                 | 29.2                        |
| BP                | 4.63    | 3.30    | 3.11                 | 33.4                        |

### S3. Comparison of interlayer binding energy of 2D semiconductors between this work and previous studies

**Table S2** Comparison of interlayer binding energy ( $E_b$ ) of 2D semiconductors between this work and previous reports.

| Materials         | Methods    | $E_b$ (meV/Å <sup>2</sup> ) | References |
|-------------------|------------|-----------------------------|------------|
| BP                | DFT-D3     | 33.4                        | This work  |
|                   | optB88-vdW | 29.9                        | 1          |
|                   | PBE        | 38.2                        | 2          |
| MoS <sub>2</sub>  | DFT-D3     | 25.2                        | This work  |
|                   | optB88-vdW | 24.2                        | 1          |
|                   | DFT-D3     | 27.1                        | 3          |
| MoSe <sub>2</sub> | DFT-D3     | 27.1                        | This work  |
|                   | Experiment | 22.2                        | 4          |
| MoTe <sub>2</sub> | DFT-D3     | 26.1                        | This work  |
|                   | PBE        | 23.1                        | 2          |
| WS <sub>2</sub>   | DFT-D3     | 26.1                        | This work  |
|                   | DFT-D3     | 27.9                        | 3          |
| GeS               | DFT-D3     | 29.7                        | This work  |
|                   | vdW-DF2    | 28.4                        | 5          |
|                   | DFT-D2     | 32.5                        | 6          |
| GeSe              | DFT-D3     | 29.2                        | This work  |
|                   | PBE        | 31.9                        | 2          |
|                   | DFT-D2     | 28.1                        | 6          |
|                   | vdW-DF2    | 30.8                        | 5          |
| SnSe              | DFT-D3     | 30.1                        | This work  |
|                   | optB88-vdW | 32.1                        | 1          |

#### S4. Comparison of interlayer binding energy and interlayer distance between the bilayer and bulk van der Waals crystals

**Table S3** Comparison of interlayer binding energy ( $E_b$ ) and interlayer distance ( $d_{\text{int}}$ ) in twelve van der Waals crystals with bilayer and bulk structures.

| Materials         | Bilayer                     |                      | Bulk                        |                      |
|-------------------|-----------------------------|----------------------|-----------------------------|----------------------|
|                   | $E_b$ (meV/Å <sup>2</sup> ) | $d_{\text{int}}$ (Å) | $E_b$ (meV/Å <sup>2</sup> ) | $d_{\text{int}}$ (Å) |
| PtSe <sub>2</sub> | 35.7                        | 2.27                 | 37.6                        | 2.19                 |
| HfSe <sub>2</sub> | 22.3                        | 3.13                 | 23.3                        | 3.04                 |
| WS <sub>2</sub>   | 26.1                        | 3.18                 | 28.8                        | 3.07                 |
| MoS <sub>2</sub>  | 25.2                        | 3.18                 | 27.2                        | 3.09                 |
| ReS <sub>2</sub>  | 21.1                        | 3.63                 | 25.2                        | 3.42                 |
| ReSe <sub>2</sub> | 23.1                        | 3.41                 | 26.5                        | 3.32                 |
| SnS               | 29.3                        | 2.63                 | 30.2                        | 2.61                 |
| SnSe              | 30.1                        | 2.74                 | 30.8                        | 2.67                 |
| GeS               | 29.7                        | 2.65                 | 30.3                        | 2.61                 |
| GeSe              | 29.2                        | 2.94                 | 30.0                        | 2.66                 |
| BP                | 33.4                        | 3.11                 | 37.4                        | 3.08                 |
| Graphene          | 16.6                        | 3.54                 | 17.9                        | 3.47                 |

### S5. Projected band structures of trilayer PtSe<sub>2</sub> and HfSe<sub>2</sub>

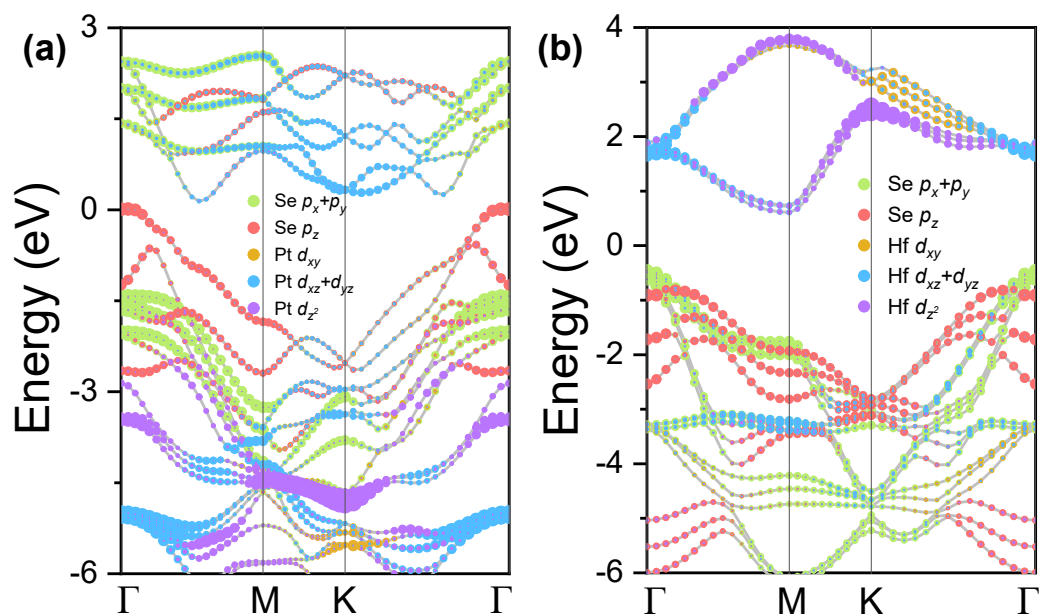

**Fig. S2** Projected band structure of (a) 3L-PtSe<sub>2</sub> and (b) 3L-HfSe<sub>2</sub>. The Fermi level position is set to energy zero point.

### S6. Projected density of states of 2D PtSe<sub>2</sub> and HfSe<sub>2</sub>

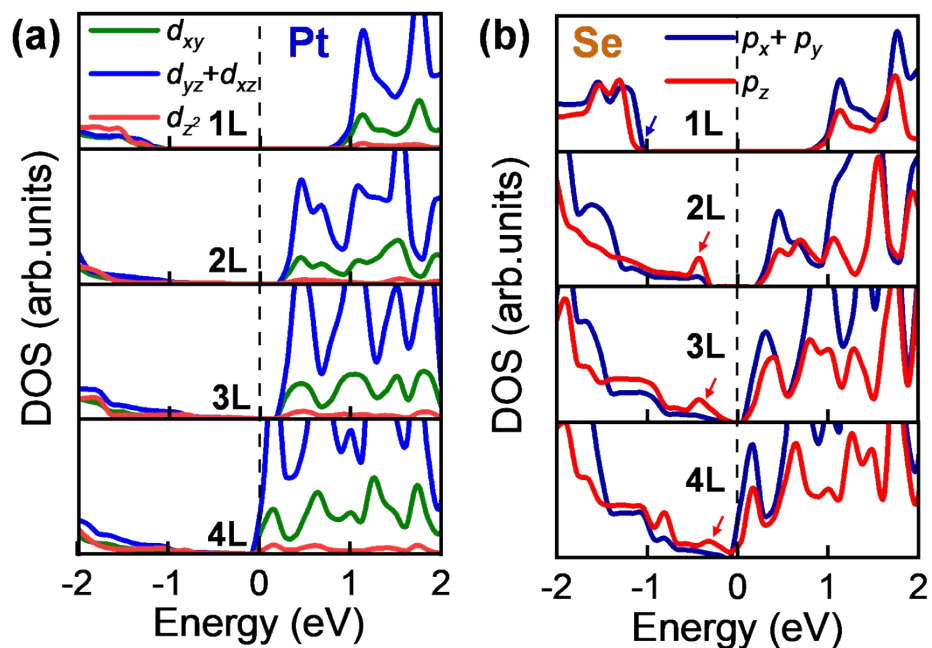

**Fig. S3** Projected density of states of (a) Pt and (b) Se atoms in 2D PtSe<sub>2</sub> with the range of layer number from 1L to 4L. The dash lines denote the position of Fermi level.

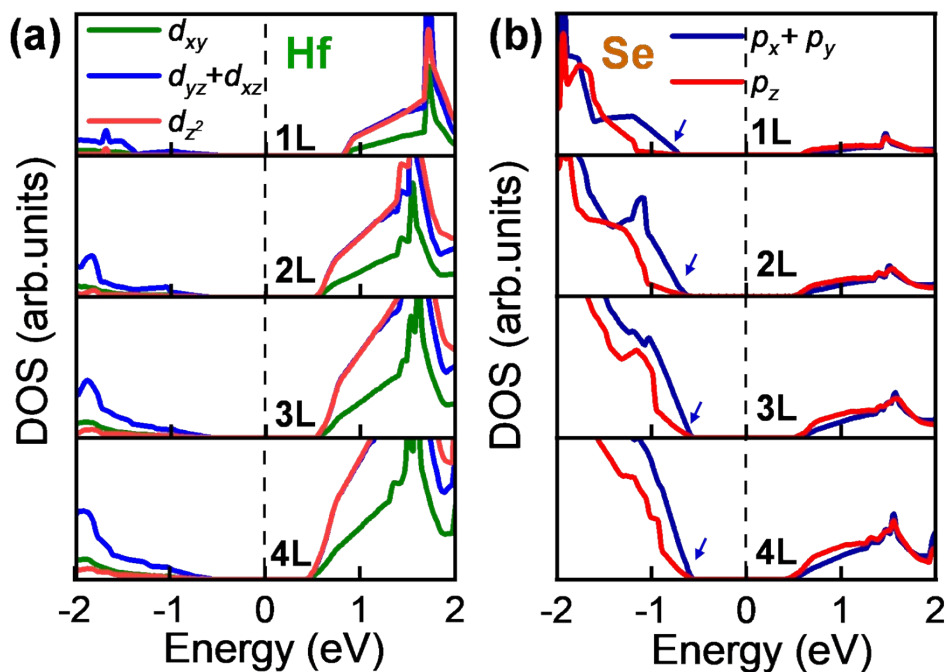

**Fig. S4** Projected density of states of (a) Hf and (b) Se atoms in 2D HfSe<sub>2</sub> with the range of layer number from 1L to 4L. The dash lines denote the position of Fermi level.

### S7. Transmission spectra of 2D PtSe<sub>2</sub> and HfSe<sub>2</sub> devices

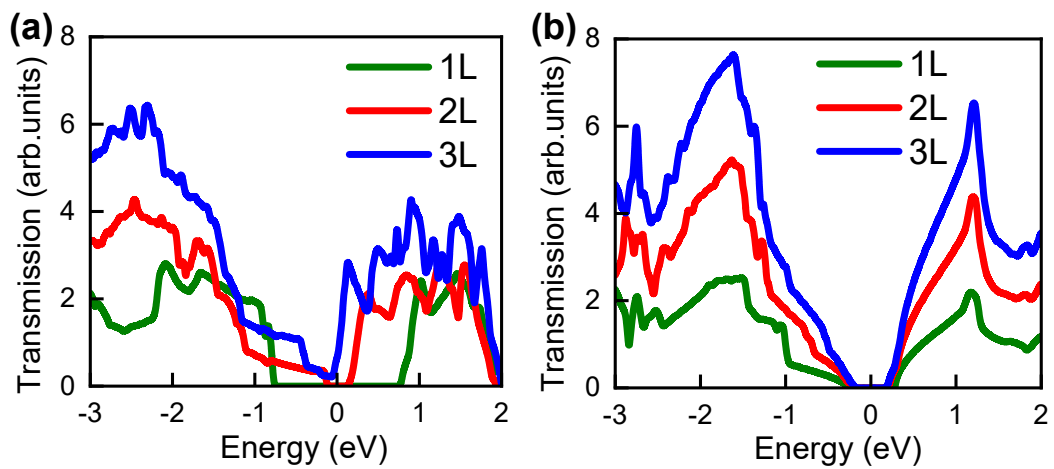

**Fig. S5** Transmission spectra of 2D (a) PtSe<sub>2</sub> and (b) HfSe<sub>2</sub> devices with the range of layer number from 1L to 3L.



## S8. Polarized photocurrent angle of 2D PtSe<sub>2</sub> and HfSe<sub>2</sub> under different photon energies

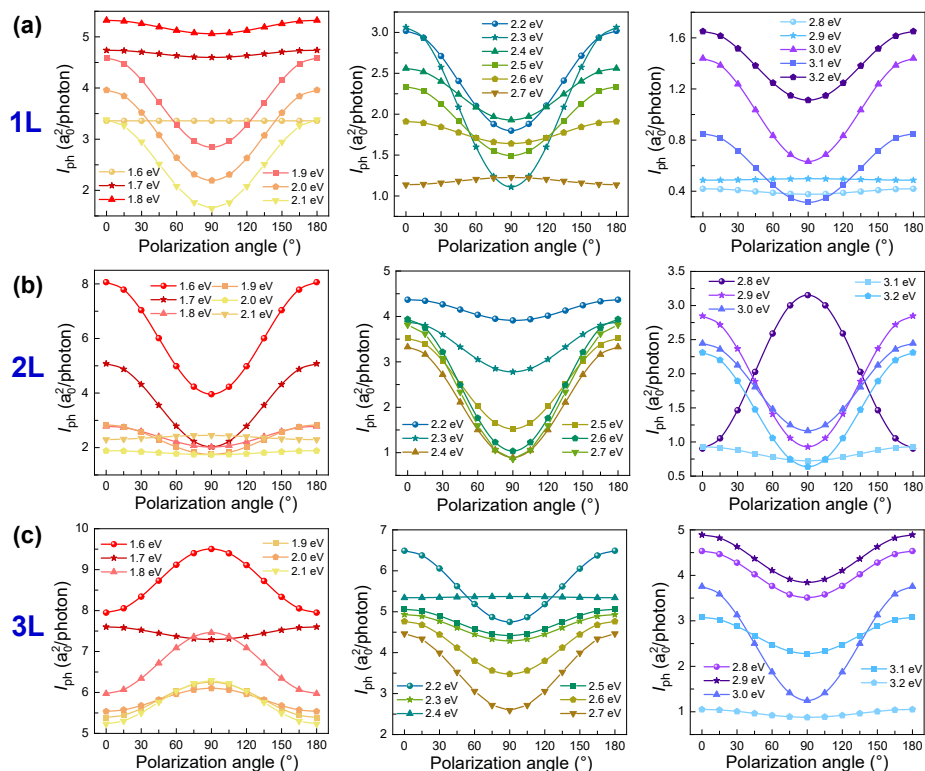

**Fig. S6** The polarized  $I_{ph}$  of (a) 1L-PtSe<sub>2</sub>, (b) 2L-PtSe<sub>2</sub>, and (c) 3L-PtSe<sub>2</sub> devices as a function of polarization angle under different photon energies.

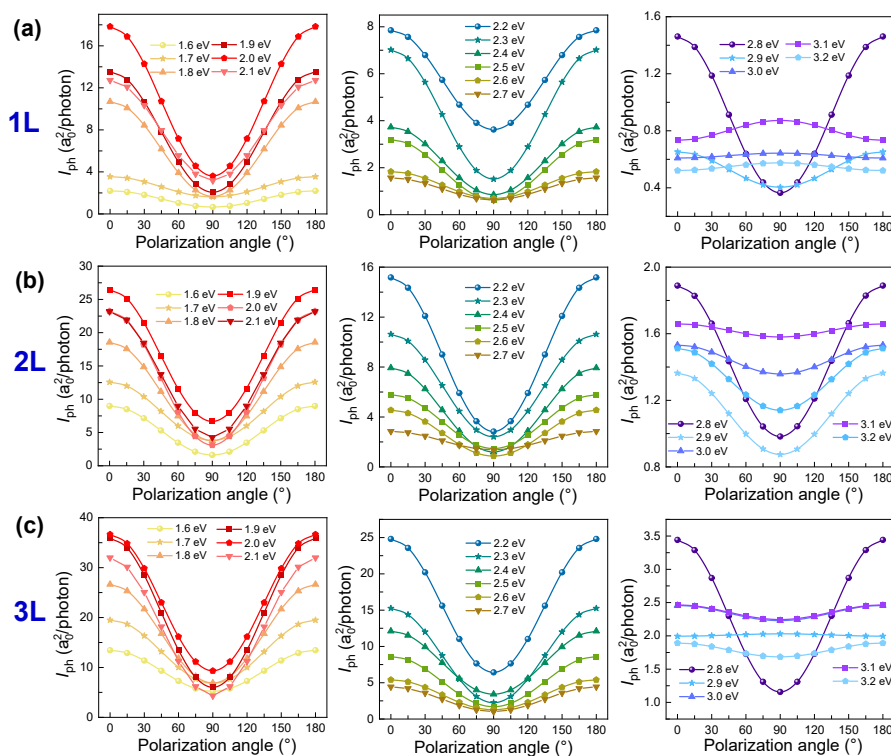

**Fig. S7** The polarized  $I_{ph}$  of (a) 1L-HfSe<sub>2</sub>, (b) 2L-HfSe<sub>2</sub>, and (c) 3L-HfSe<sub>2</sub> devices as a function of polarization angle under different photon energies.

## References

- 1 L.-C. Zhang, G. Qin, W.-Z. Fang, H.-J. Cui, Q.-R. Zheng, Q.-B. Yan and G. Su, *Sci. Rep.*, 2016, **6**, 19830.
- 2 N. Karmodak and O. Andreussi, *ACS Energy Lett.*, 2020, **5**, 885–891.
- 3 J. Liu, T. Shen, J.-C. Ren, S. Li and W. Liu, *Applied Surface Science*, 2023, **608**, 155163.
- 4 E. Blundo, T. Yildirim, G. Pettinari and A. Polimeni, *Phys. Rev. Lett.*, 2021, **127**, 046101.
- 5 S. P. Poudel, J. W. Villanova and S. Barraza-Lopez, *Phys. Rev. Mater.*, 2019, **3**, 124004.
- 6 X. Lv, W. Wei, Q. Sun, F. Li, B. Huang and Y. Dai, *Appl. Catal. B: Environ.*, 2017, **217**, 275–284.
